# Supplementary material
Source: Springer Nature journal article supplement (https://www.springermedizin.de/resource/supplementary/12943_2014_1385_MOESM7_ESM.pdf/9552860)
Supplement: MOESM7 [file 9552860]

**Table S2.** List of primer sequences used in PCR, qRT-PCR, MSP and bisulfite sequencing analysis.

| <b>qRT-PCR primers</b>         | <b>Sequence (5' → 3')</b>                                                                       |
|--------------------------------|-------------------------------------------------------------------------------------------------|
| HSA-MIR-31                     | Stem-loop:<br>GGAGAGGAGGCAAGAUGCUGGCAUA<br>GCUGUUGAACUGGGAACCGCUGCUAUGC<br>CAACAUAUUGCCAUCUUUCC |
| MCM2-F                         | CAAGACTTTTGCCCGCTACCT                                                                           |
| MCM2-R                         | TCTGCCACTAACTGCTTCAGTATGA                                                                       |
| FIH1-F                         | CACATAGGCTTGCGTCTTAAAGC                                                                         |
| FIH1-R                         | TTGAGGGTGTGTTGTGGCACATT                                                                         |
| <b>PCR primers for mapping</b> | <b>Sequence (5' → 3')</b>                                                                       |
| 9p – 1Mb-F                     | CCTGCTGTGCACTAGATCTC                                                                            |
| 9p – 1Mb-R                     | AGGGCTCCCCTGATTCTG                                                                              |
| 9p + 1Mb-F                     | GTTATGCTGCATTCCAGATGG                                                                           |
| 9p + 1Mb-R                     | GTAATGCTTCCAGGTCTATGC                                                                           |
| 9p – 2Mb-F                     | CTGCACGCGTAACTCGTCAT                                                                            |
| 9p – 2Mb-R                     | GGAAACCATCATTCTCAGCAAACCT                                                                       |
| 9p + 2Mb-F                     | GAATGCTGCGGAGAAACATG                                                                            |
| 9p + 2Mb-R                     | CACTGTGCAGATAAAGGGAAC                                                                           |
| 9 + 5Mb-F                      | AAACGTAGCAGTCAGGAGGC                                                                            |
| 9 + 5Mb-R                      | TCAACAGCGGGAATAACACA                                                                            |
| LOC402359-F                    | TGGGGATCCTTACAAAGTGC                                                                            |
| LOC402359-R                    | CTTCGTGTAGTCCTGCTGCC                                                                            |
| DMRTA1-F                       | AGTGTCTCAAGACCAAGAGATCCT                                                                        |
| DMRTA1-R                       | TGAAAGGCTGTGTTTTCCAGTTC                                                                         |
| MIR-31-F                       | CTTGAGGGTCCTATGGAGTCA                                                                           |
| MIR-31-R                       | GCCAGTCCTTCGTGTATTGC                                                                            |
| CDKN2A (p16)-F                 | GAATCCCGTAGCTTCCCTAC                                                                            |
| CDKN2A (p16)-R                 | CGGGTCCCGATTAGAAGG                                                                              |
| <b>MSP primers</b>             | <b>Sequence (5' → 3')</b>                                                                       |
| <i>miR-31</i> -Left M primer   | TTGTGTATAATTTGGGGCGTC                                                                           |
| <i>miR-31</i> Right M primer   | CCAACCTTACCTACGAATCCGA                                                                          |
| <i>miR-31</i> Left U primer    | TTGTGTATAATTTGGGGTGTGTTGT                                                                       |
| <i>miR-31</i> Right U primer   | CTCCCAACTTACCTACAAATCCA                                                                         |

---

| <b>Bisulfite sequencing primers</b>      | <b>Sequence (5' → 3')</b> |
|------------------------------------------|---------------------------|
| <i>miR-31</i> -Left primer (fragment 1)  | GGTTTTTTAGGAGGAGTTTGGT    |
| <i>miR-31</i> -Right primer (fragment 1) | AAACTCTCCCAACTTACCTAC     |
| <i>miR-31</i> -Left primer (fragment 2)  | GTAGGTAAGTTGGGAGAGTTTT    |
| <i>miR-31</i> -Right primer (fragment 2) | ACCTAAAATTTAAACAAAAAAA    |

---
